# Supplementary material
Source: PubMed Central journal article supplement (PMC4005987)

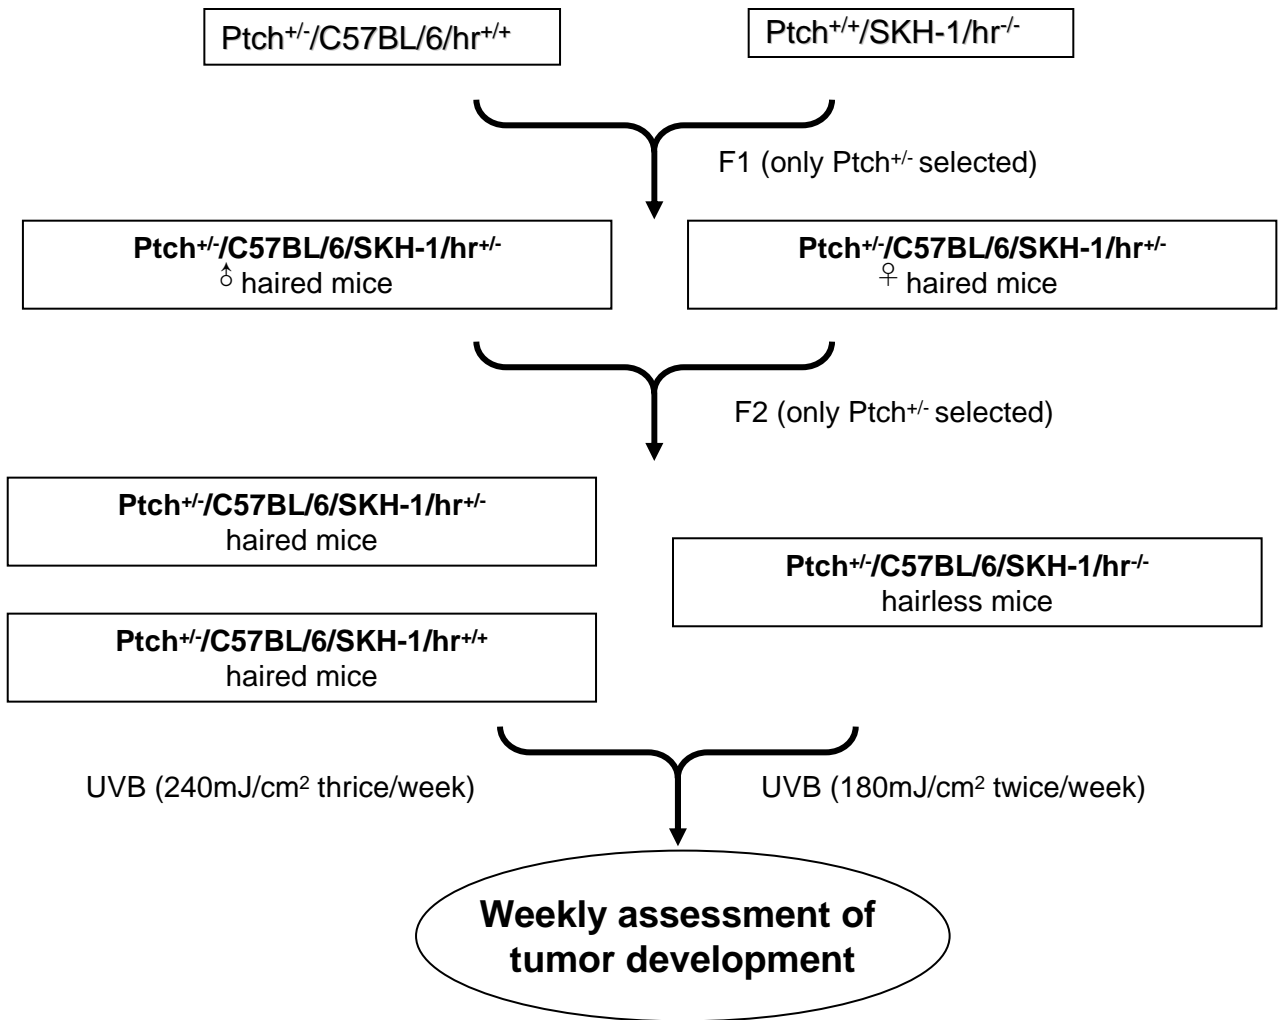

Supplement: mmc1.pdf [file mmc1.pdf]

# Haired

# Hairless

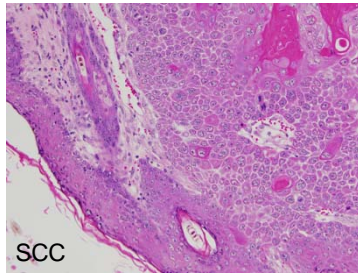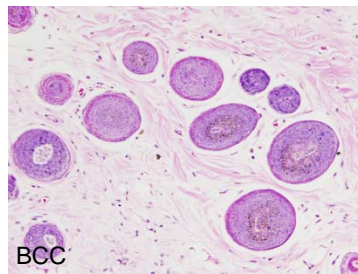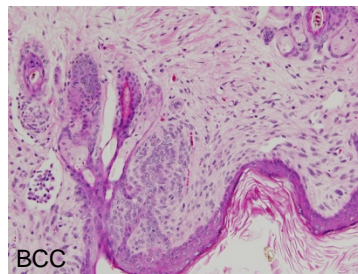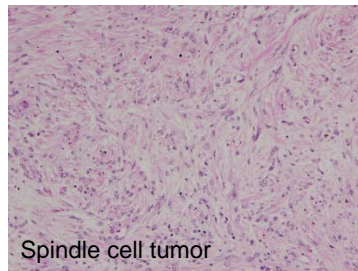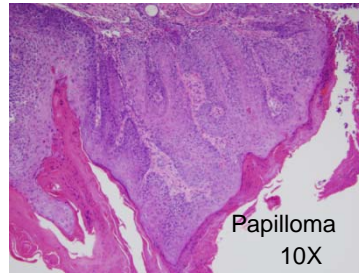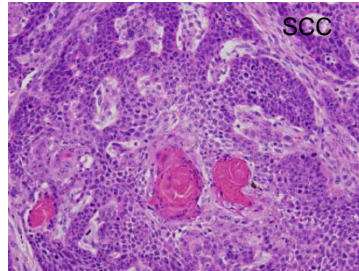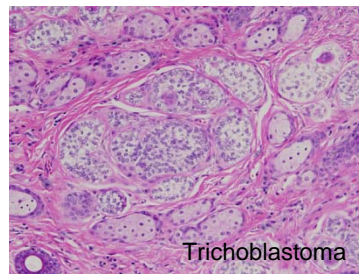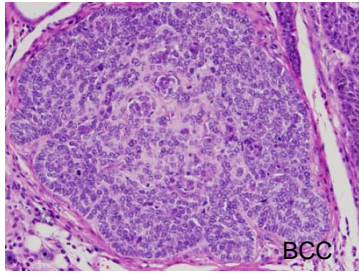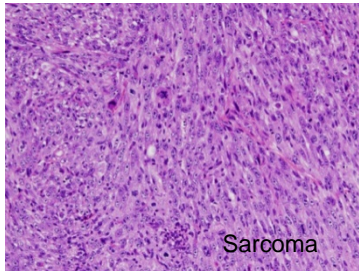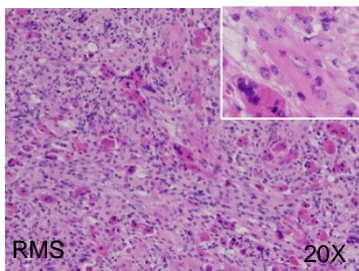

Supplement: mmc2.pdf [file mmc2.pdf]

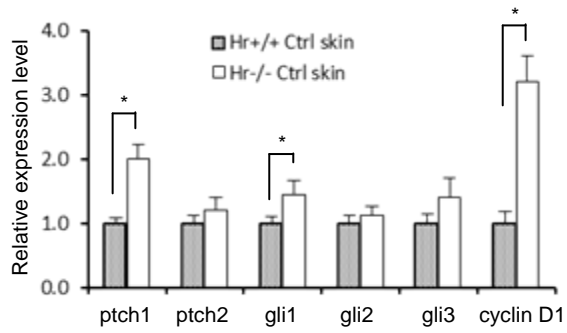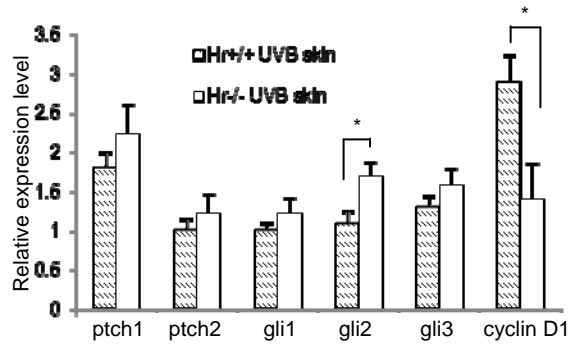

Supplement: mmc3.pdf [file mmc3.pdf]

# SCC

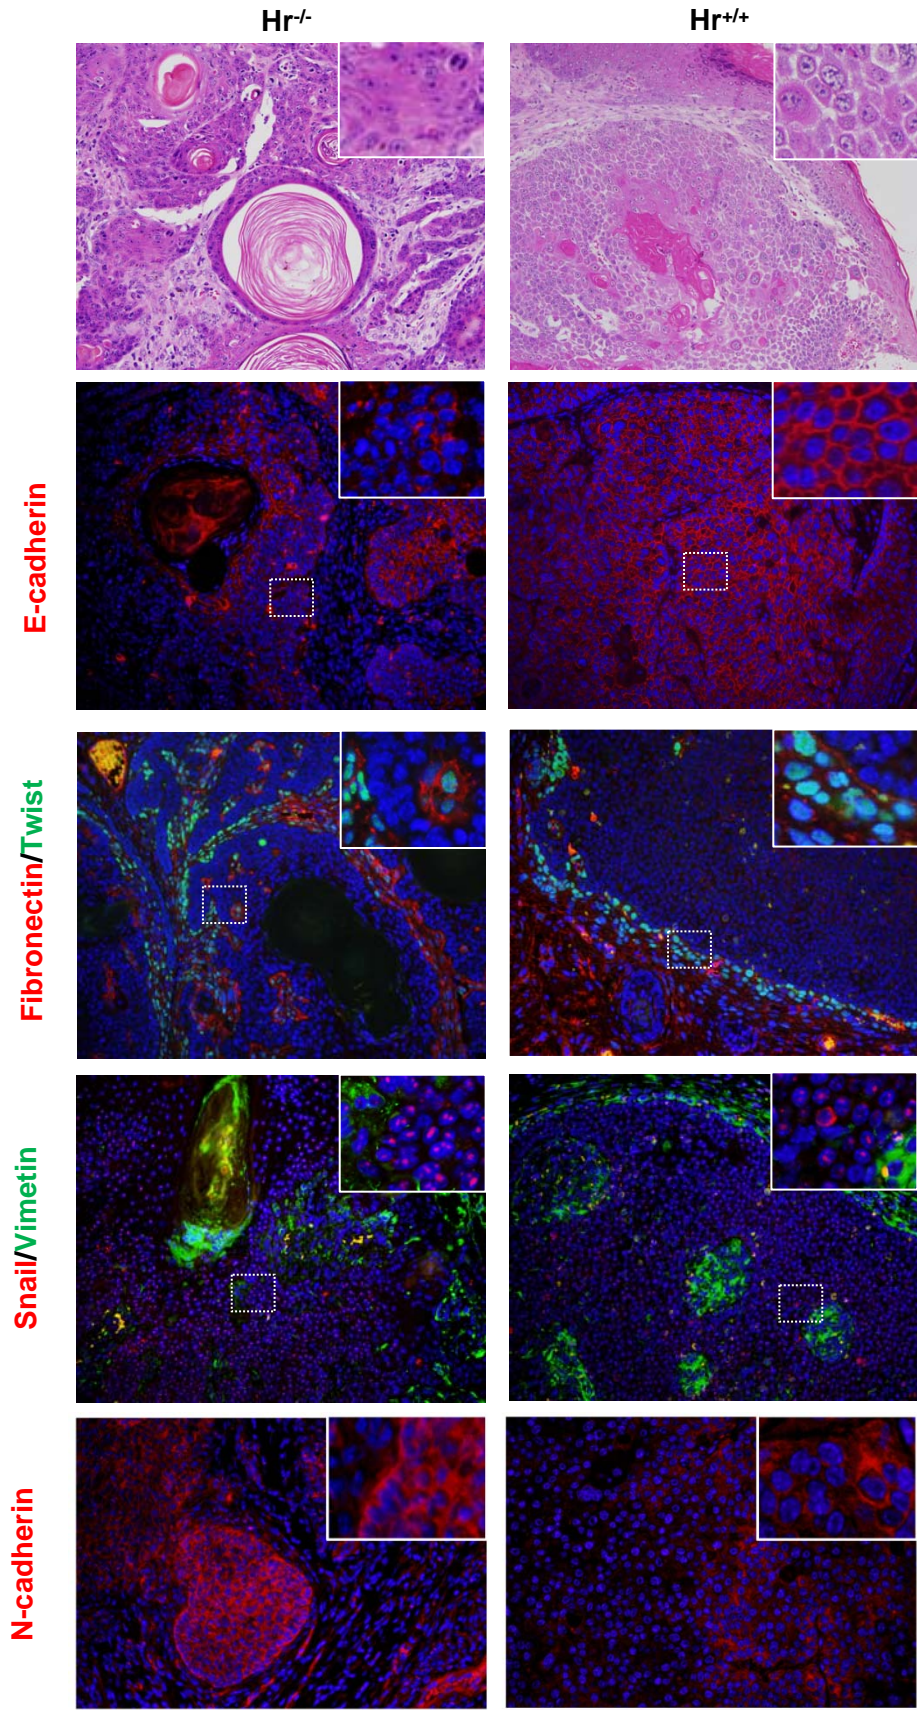

Supplement: mmc5.pdf [file mmc5.pdf]

# SKH-1/hr<sup>-/-</sup> mice

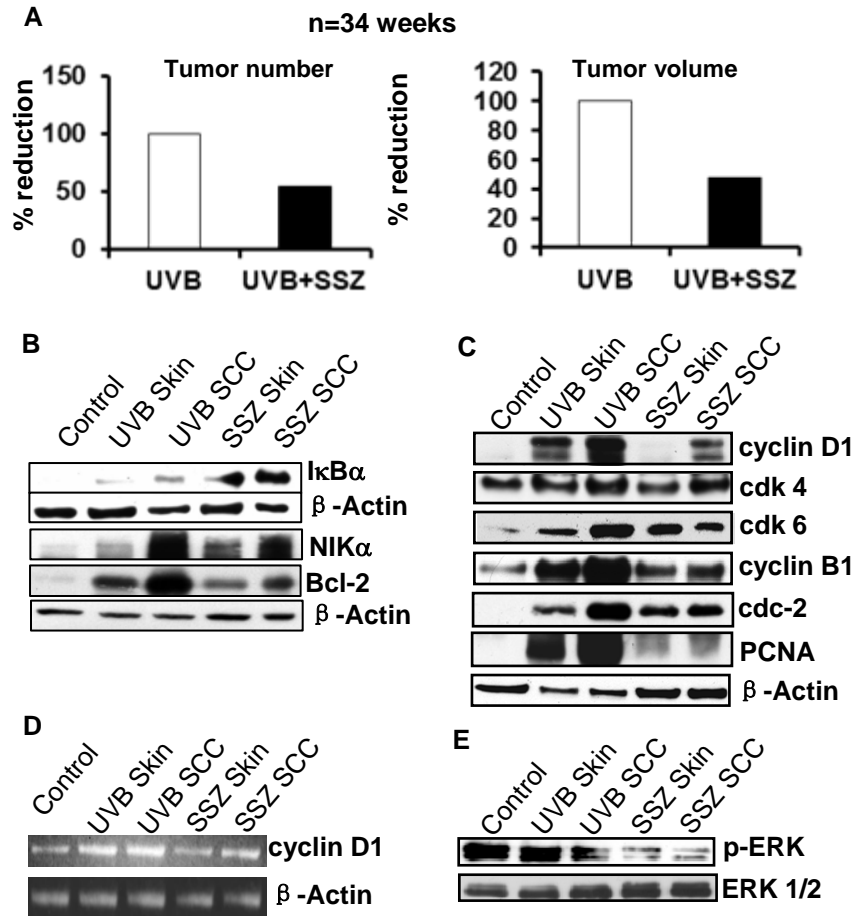

Supplement: mmc6.pdf [file mmc6.pdf]
